# Supplementary material
Source: PubMed Central journal article supplement (PMC2754689)

Supplemental Fig. 1

ARC:

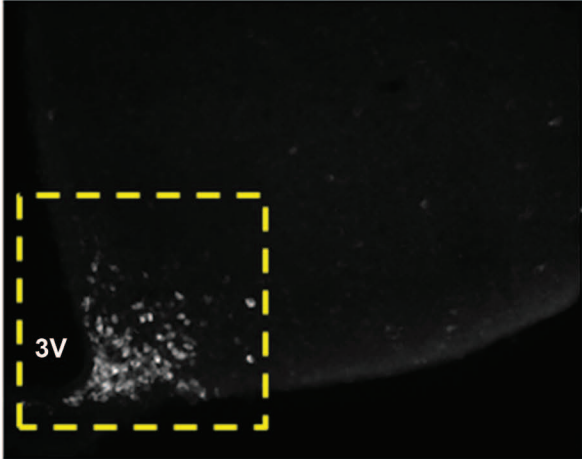

VMH:

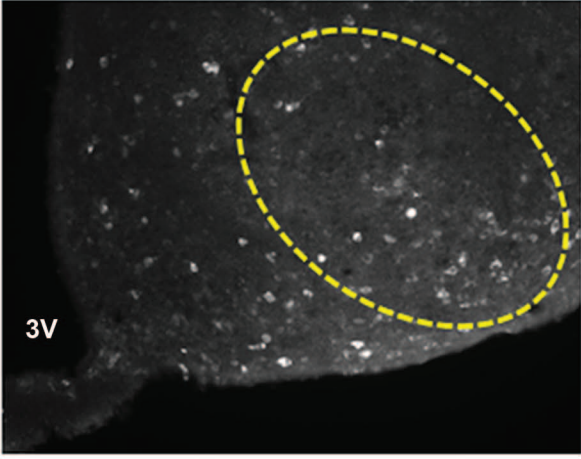

Supplement: en.2009-0642_1.pdf [file en.2009-0642_1.pdf]

Supplemental Fig. 2

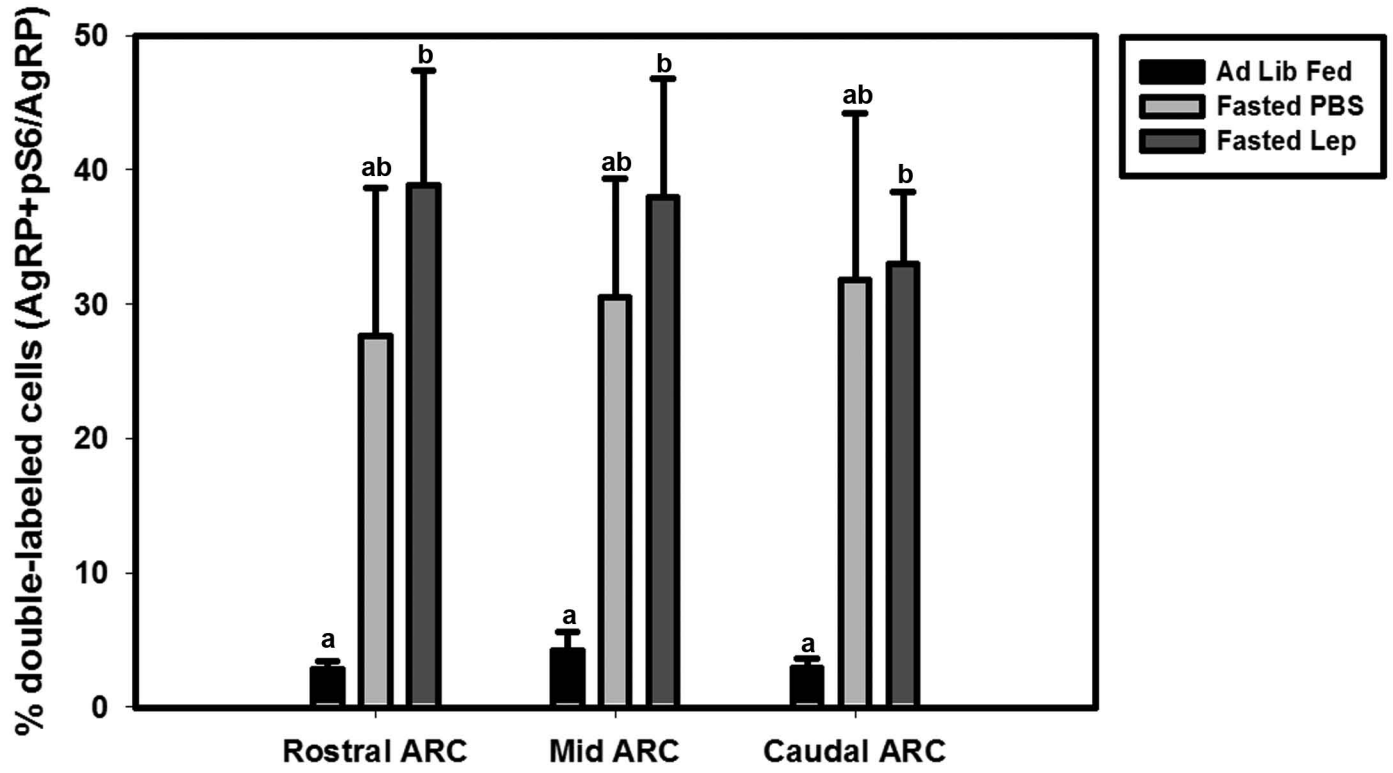

Supplement: en.2009-0642_2.pdf [file en.2009-0642_2.pdf]

Supplemental Fig. 3

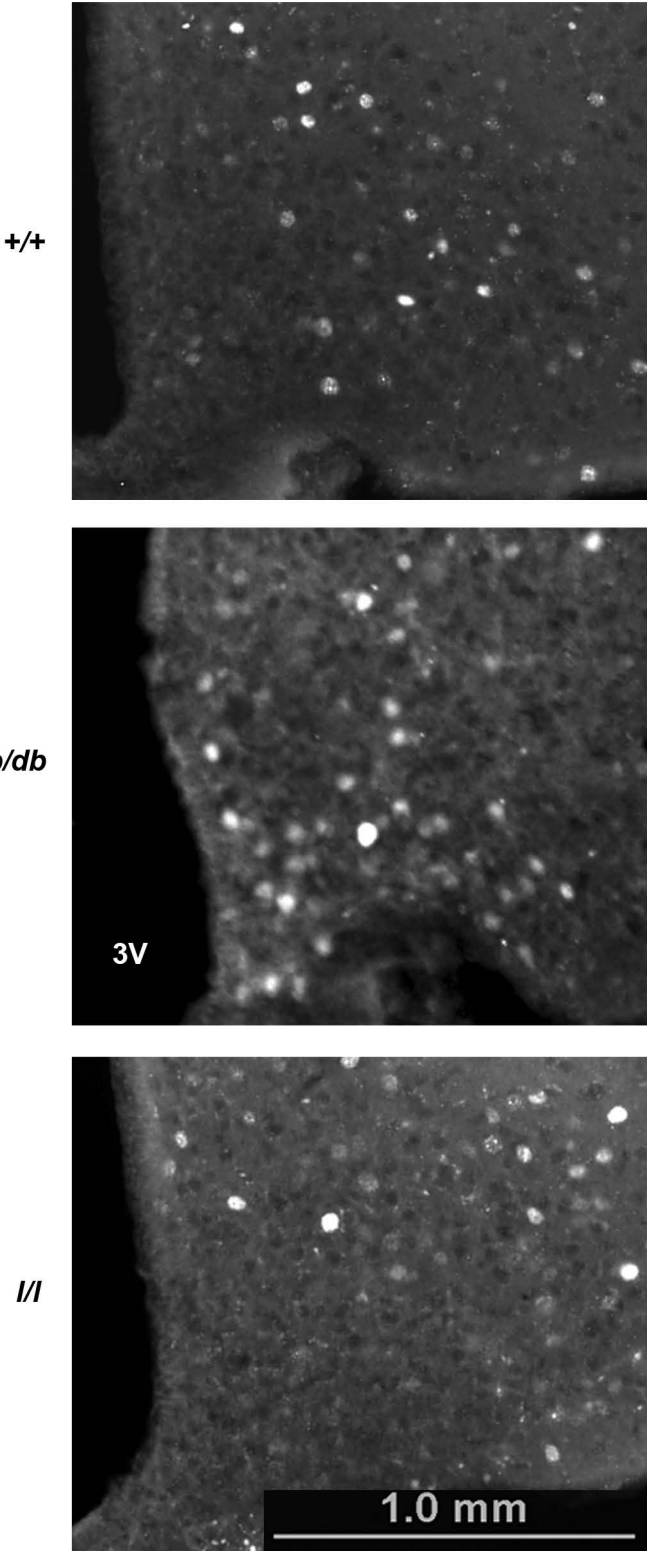

Supplement: en.2009-0642_3.pdf [file en.2009-0642_3.pdf]
